# Supplementary material for: Building a diverse and equitable distributed wind workforce: a strategic approach to collaborator selection
Source: Copernicus journal article supplement (doi:10.5194/wes-10-2351-2025), 2025-10-24
Supplement: Supplementary file [file wes-10-2351-2025-supplement-title-page.pdf › wes-10-2351-2025-supplement-title-page.pdf]

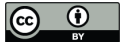

*Supplement of*

## **Building a diverse and equitable distributed wind workforce: a strategic approach to collaborator selection**

**Kendall Parker et al.**

*Correspondence to:* Kendall Parker ([kendall.parker@pnnl.gov](mailto:kendall.parker@pnnl.gov))

- [wes-10-2351-2025-supplement-title-page.pdf](#)
- [WES-2024-145\\_data\\_prep.R](#)
- [WES-2024-145\\_postprocessing.R](#)
- [WES-2024-145\\_rubric.R](#)

The copyright of individual parts of the supplement might differ from the article licence.
